# Supplementary material
Source: PubMed Central journal article supplement (PMC5540048)
Supplement: jamaoncol-3-817-s001.pdf [file jamaoncol-3-817-s001.pdf]

## Supplementary Online Content

Rocque GB, Pisu M, Jackson BE, et al; Patient Care Connect Group. Resource use and Medicare costs during lay navigation for geriatric patients with cancer. *JAMA Oncol*. Published online January 26, 2017. doi:10.1001/jamaoncol.2016.6307

**eTable.** HCPCS Codes for Emergency Room and Intensive Care Unit Visits

This supplementary material has been provided by the authors to give readers additional information about their work.

**eTable.** HCPCS Codes for Emergency Room and Intensive Care Unit Visits

|                                    | HCPCS Code | Definition                                                  |
|------------------------------------|------------|-------------------------------------------------------------|
| Emergency Room visits <sup>a</sup> | 0450       | Emergency room-general classification                       |
|                                    | 0451       | Emergency room-emptala emergency medical screening services |
|                                    | 0452       | Emergency room-ER beyond emptala screening                  |
|                                    | 0456       | Emergency room-Urgent care                                  |
|                                    | 0459       | Emergency room-other                                        |
|                                    | 0981       | Professional fees-emergency room                            |
| ICU visits <sup>b</sup>            | 0200       | Intensive care-general classification                       |
|                                    | 0201       | Intensive care-surgical                                     |
|                                    | 0202       | Intensive care-medical                                      |
|                                    | 0203       | Intensive care-pediatric                                    |
|                                    | 0204       | Intensive care-psychiatric                                  |
|                                    | 0207       | Intensive care-burn care                                    |
|                                    | 0208       | Intensive care-trauma                                       |
|                                    | 0209       | Intensive care-other intensive care                         |

<sup>a</sup><http://resdac.advantagelabs.com/resconnect/articles/144>

<sup>b</sup><http://resdac.advantagelabs.com/cms-data/variables/MEDPAR-Intensive-Care-Unit-ICU-Indicator-Code>
